# Supplementary material for: A Mobile Health Intervention Supporting Heart Failure Patients and Their Informal Caregivers: A Randomized Comparative Effectiveness Trial
Source: PubMed Central journal article supplement (PMC4526929; doi:10.2196/jmir.4550), 2015-06-10
Supplement: jmir_v17i6e142_app1.pdf [file jmir_v17i6e142_app1.pdf]

## Multimedia Appendix 1. Operationalization of Inclusion and Exclusion Criteria

### *Electronic Inclusion criteria:*

#### Include patients with:

- a. Diagnosis of heart failure (New York Heart Association classification II-III) and
- b. Patients who have had an out patient visit within the last 12 months

### **ICD-9 CODES FOR HEART FAILURE: CHF PATIENT RECRUITMENT**

428.0  
428.1  
428.9  
428.3  
428

402.0-402.9 (w/a fifth-digit 1), or 404.0-404.9 (w/a fifth-digit 1 or 3), and 428.0-428.9.

### *Electronic Exclusion Criteria:*

#### Exclude patients with any of the following:

1. End stage renal disease ( codes 4031 or 4042 or 4043) OR
2. Lung cancer ( codes 1990) OR
3. Dementia (codes 0461, 0463, 2900, 29010, 29011, 29012, 29013, 29020, 29021, 2903, 29040, 29041, 29042, 29043, 2908, 2909, 3310, 3311, 3312, 3317, 3319) OR
4. Bipolar ( codes 2960, 2961, 2964, 2965, 2966, 2967, 2968) OR
5. Schizophrenia (codes 2950, 2951, 2952, 2953, 2954, 2956, 2957, 2958, 2959)

CHF patients with most recent ejection fraction > 40%

### *Non-Electronic Exclusion Criteria:*

#### **Phone screening: exclude if any of the following:**

- Can't speak English
- Limited life expectancy (advanced stage cancer, heart failure, on oxygen, end stage renal disease).
- Not planning to get all or most of care at study site.
- PCP isn't affiliated with study site.
- Alcohol problems
- Illegal drug use
- Receiving palliative care due to advanced HF or other health problems
- Unable to use a telephone to respond to weekly automated self-management support calls
- Unable to nominate an eligible CP

***For the CarePartner Inclusion Criteria:***

- Must live outside of the patients home, at any distance within the United States
- Must have access to a computer with an Internet connection, either at home or through some other location
- Have ability to communicate via e-mail
- CPs must report talking with the patient by phone or in-person at least once per month over the prior 6 months
- Must agree with additional criteria for patient involvement

***For the CarePartner Exclusion Criteria:***

- Have a serious mental illness (bipolar/schizophrenia)
- Cannot speak English
- Less than 21 years of age
- No working telephone in their home
