# Supplementary material for: A Mobile Health Intervention Supporting Heart Failure Patients and Their Informal Caregivers: A Randomized Comparative Effectiveness Trial
Source: PubMed Central journal article supplement (PMC4526929; doi:10.2196/jmir.4550), 2015-06-10
Supplement: jmir_v17i6e142_app5.pdf [file jmir_v17i6e142_app5.pdf]

**Multimedia Appendix 5. Comparison of Baseline Characteristics for Patients with and without Follow-up Data**

|                                                | All Enrollees<br>N=372 | Analytic<br>Sample n=331 | Lost to Follow-up<br>n=41 | p-value |
|------------------------------------------------|------------------------|--------------------------|---------------------------|---------|
| <b><u>Patient Characteristics</u></b>          |                        |                          |                           |         |
| Age in years                                   | 67.9 ± 10.2            | 67.8 ± 10.2              | 68.4 ± 10.6               | .722    |
| Male                                           | 98.9                   | 99.4                     | 95.1                      | .012    |
| White race                                     | 76.6                   | 77.0                     | 73.2                      | .830    |
| Married/Partnered                              | 58.9                   | 58.9                     | 58.5                      | .963    |
| High School or less                            | 49.2                   | 48.0                     | 58.5                      | .211    |
| Live alone                                     | 32.8                   | 32.6                     | 34.1                      | .845    |
| Unemployed/retire                              | 87.9                   | 87.6                     | 90.2                      | .626    |
| Income < \$15,000                              | 31.7                   | 31.4                     | 34.1                      | .772    |
| CES-D Depression                               | 3.0 ± 2.5              | 2.97 ± 2.49              | 3.56 ± 2.05               | .143    |
| MLHFQ <sup>a</sup>                             | 44.2 ± 25.6            | 43.3 ± 25.3              | 50.7 ± 27.1               | .096    |
| HFSCB <sup>b</sup>                             | 83.8 ± 18.1            | 82.8 ± 17.9              | 91.8 ± 17.9               | .002    |
| Adherent to HF Rx <sup>c</sup>                 | 52.4                   | 52.3                     | 53.7                      | .866    |
| <b><u>Relationship Quality<sup>d</sup></u></b> |                        |                          |                           |         |
| Talk 2+ times/ week                            | 63.4                   | 65.9                     | 43.9                      | .006    |
| Negative emotions <sup>e</sup>                 | 45.8                   | 44.8                     | 53.7                      | .284    |
| Perceived difficulty <sup>f</sup>              | 21.5                   | 21.5                     | 22.0                      | .941    |

**Multimedia Appendix 5 (continued). Comparison of Baseline Characteristics for Patients with and without Follow-up Data**

|                                               | All Enrollees<br>N=372 | Analytic<br>Sample n=331 | Lost to Follow-up<br>n=41 | p-value |
|-----------------------------------------------|------------------------|--------------------------|---------------------------|---------|
| <b><u>CarePartner<br/>Characteristics</u></b> |                        |                          |                           |         |
| Age                                           | 47.1 ± 13.2            | 46.7 ± 13.2              | 49.7 ± 12.5               | .171    |
| Male                                          | 34.4                   | 35.0                     | 29.3                      | .424    |
| Married/Partnered                             | 67.7                   | 68.6                     | 61.0                      | .358    |
| High School or less                           | 27.7                   | 27.8                     | 26.8                      | .924    |
| Unemployed/retired                            | 37.1                   | 36.9                     | 39.0                      | .762    |

Notes: Cell entries are either mean ± SD or percents. <sup>a</sup>Minnesota Living with Heart Failure Questionnaire Scores. Lower scores indicate better functioning. <sup>b</sup>Revised Heart Failure Self-Care Behavior Scale. Higher scores indicate better HF self-care. <sup>c</sup>Percent of patients with perfect HF medication adherence over the prior month as measured by the four HFSCB items focused on adherence (see Methods). <sup>d</sup>Patients' reports regarding their relationship with their CarePartner. <sup>e</sup>Percent of patients who report regularly experiencing any of six negative emotions when talking with their CarePartner (sadness, loneliness, anger, tension, guilt, or frustration). <sup>f</sup>Percent of patients who agree that it is "difficult to talk to [their] CarePartner about [their] illness.
